# Supplementary material
Source: Springer Nature journal article supplement (https://www.springermedizin.de/resource/supplementary/12885_2013_4158_MOESM8_ESM.pdf/9465614)

IP: IgY control RKIP

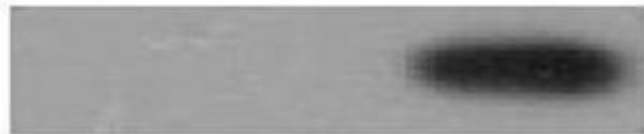

HSP90

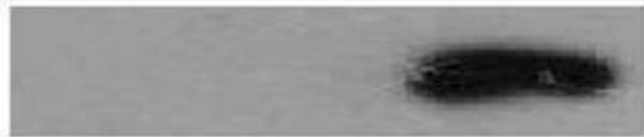

14-3-3ε

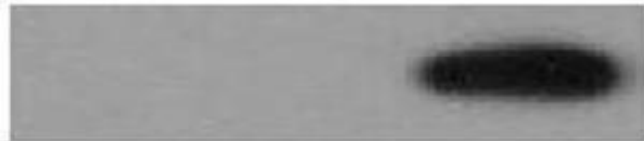

Keratin8

Supplement: MOESM8 [file 9465614]
